# Supplementary material for: Morphodynamic model of the lower Yellow River: flux or entrainment form for sediment mass conservation?
Source: Copernicus journal article supplement (doi:10.5194/esurf-6-989-2018), 2018-11-06
Supplement: Supplementary file 1 [file esurf-6-989-2018-supplement.pdf]

Supplement of Earth Surf. Dynam., 6, 989–1010, 2018  
<https://doi.org/10.5194/esurf-6-989-2018-supplement>  
© Author(s) 2018. This work is distributed under  
the Creative Commons Attribution 4.0 License.

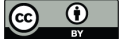

*Supplement of*

## **Morphodynamic model of the lower Yellow River: flux or entrainment form for sediment mass conservation?**

**Chenge An et al.**

*Correspondence to:* Chenge An (anchenge08@163.com) and Xudong Fu (xdfu@tsinghua.edu.cn)

The copyright of individual parts of the supplement might differ from the CC BY 4.0 License.

1 **S1: Comparison of two relations for sediment fall velocity: Dietrich (1982) against Ferguson and Church (2004)**

2 In this paper, we implement the relation of Dietrich (1982) to calculate sediment fall velocity  $v_s$ . The relation is,

3 
$$v_s = R_f \sqrt{RgD} \tag{S1}$$

4 
$$\ln(R_f) = -b_1 + b_2 \ln(\text{Re}_p) - b_3 [\ln(\text{Re}_p)]^2 - b_4 [\ln(\text{Re}_p)]^3 + b_5 [\ln(\text{Re}_p)]^4 \tag{S2}$$

5 
$$\text{Re}_p = \frac{\sqrt{RgDD}}{\nu} \tag{S3}$$

6 where  $b_1 = 2.891394$ ,  $b_2 = 0.95296$ ,  $b_3 = 0.056835$ ,  $b_4 = 0.002892$ ,  $b_5 = 0.000245$ , and  $\nu = 10^{-6}$  is the kinematic viscosity of  
7 water.

8 Another widely used relation for sediment fall velocity is the relation of Ferguson and Church (2004), which is  
9 regarded as applying to nearly the entire range of viscous to turbulent conditions.

10 
$$v_s = \frac{RgD^2}{C_1 \nu + (0.75 C_2 RgD^3)^{0.5}} \tag{S4}$$

11 where  $C_1 = 18$  and  $C_2 = 0.4$  for smooth spheres;  $C_1 = 18$  and  $C_2 = 1.0$  for sieve diameters of natural sand; and  $C_1 = 20$  and  $C_2$   
12  $= 1.1$  for nominal diameters of natural sand. More specifically, the relation of Ferguson and Church (2004) converges to Stokes'  
13 law for small grains, and to a constant drag coefficient for large grains.

14 Considering the fact that the sediment of LYR is finer than most sand-bed rivers (Ma et al., 2017), here we compare  
15 the two relations for sediment fall velocity in the context of the LYR. The two parameters in Ferguson and Church are specified  
16 as  $C_1 = 18$  and  $C_2 = 1.0$ . In our simulation, the sediment size range of the LYR is specified as  $15 \mu\text{m} \sim 500 \mu\text{m}$ .

17 According to Fig. S1, the relation of Dietrich (1982) and the relation of Ferguson and Church (2004) coincide with  
18 each other within this size range, thus justifying our implementation of Dietrich (1982) in the simulation. For grain sizes  
19 smaller than  $15 \mu\text{m}$ , sediment becomes washload in the LYR and Dietrich (1982) predicts sediment fall velocities that are  
20 smaller than those predicted by Ferguson and Church (2004). For sediment coarser than  $500 \mu\text{m}$ , Dietrich (1982) somewhat  
21 overestimates sediment fall velocity compared with Ferguson and Church (2004).

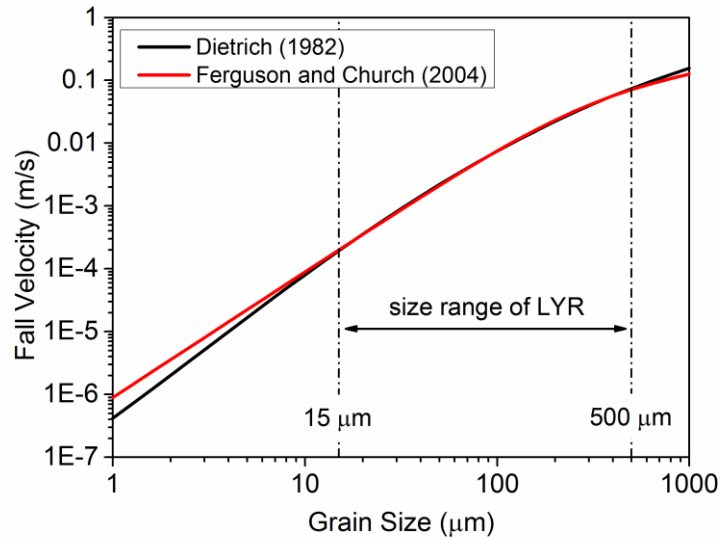

22  
23 **Figure S1.** Comparison of two relations for sediment fall velocity: Dietrich (1982) and Ferguson and Church (2004)

24 **S2: Numerical simulation of uniform sediment under hydrographs**

25 In this section, we conduct additional cases for the case of uniform sediment. The computational conditions are the  
26 same as those implemented in Section 3.1 of the main text, except that the unsteady inflow discharge is considered. The flood  
27 has a symmetrical triangular hydrograph with a peak discharge of  $3000 \text{ m}^3/\text{s}$  (corresponding to a discharge per unit width of  
28  $10 \text{ m}^2/\text{s}$ ), a minimum discharge of  $300 \text{ m}^3/\text{s}$  (corresponding to a discharge per unit width of  $1 \text{ m}^2/\text{s}$ ), and a flood duration of 4  
29 days. Figure S2 shows the hydrograph as used here. The flood intermittency factor is specified as unity since hydrographs are  
30 being considered. The sediment supply rate is the same as that in Section 3.1 of the main text, thus corresponding to a cutoff  
31 of sediment supply. The hydrograph is repeated for 3 times.

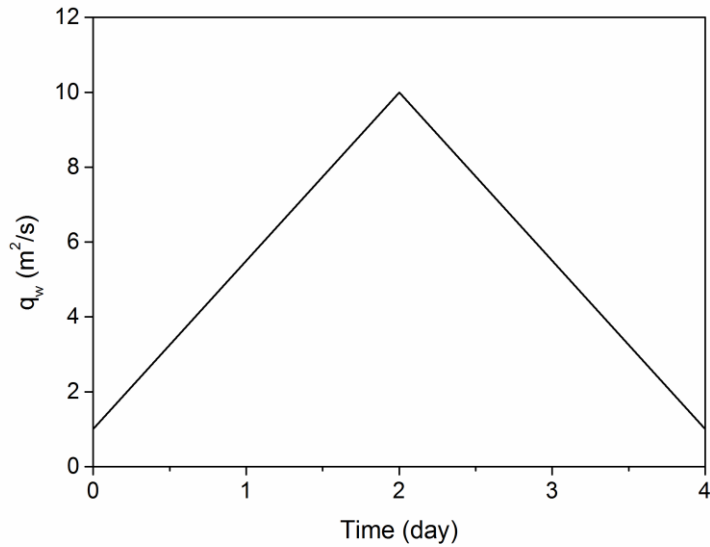

32  
33 **Figure S2.** Hydrograph of the inflow discharge

34           Figure S3 shows the river evolution within the 3 floods predicted by the flux form of Exner equation. Due to the  
35 cutoff of sediment supply, the bed degrades and the sediment load declines from the upstream end. Moreover, sediment load  
36 shows a reduction in the downstream direction at the peak discharge, but an increase at the low discharge, which corresponds  
37 to the nonuniformity of the flow hydraulics (i.e. the propagation of a flood wave). Figure S4 shows the river evolution predicted  
38 by the entrainment form of the Exner equation, with the sediment fall velocity calculated by the relation of Dietrich (1982). A  
39 comparison of Figs. S3 and S4 indicates that the two formulations predict very similar results even when hydrographs are  
40 considered.

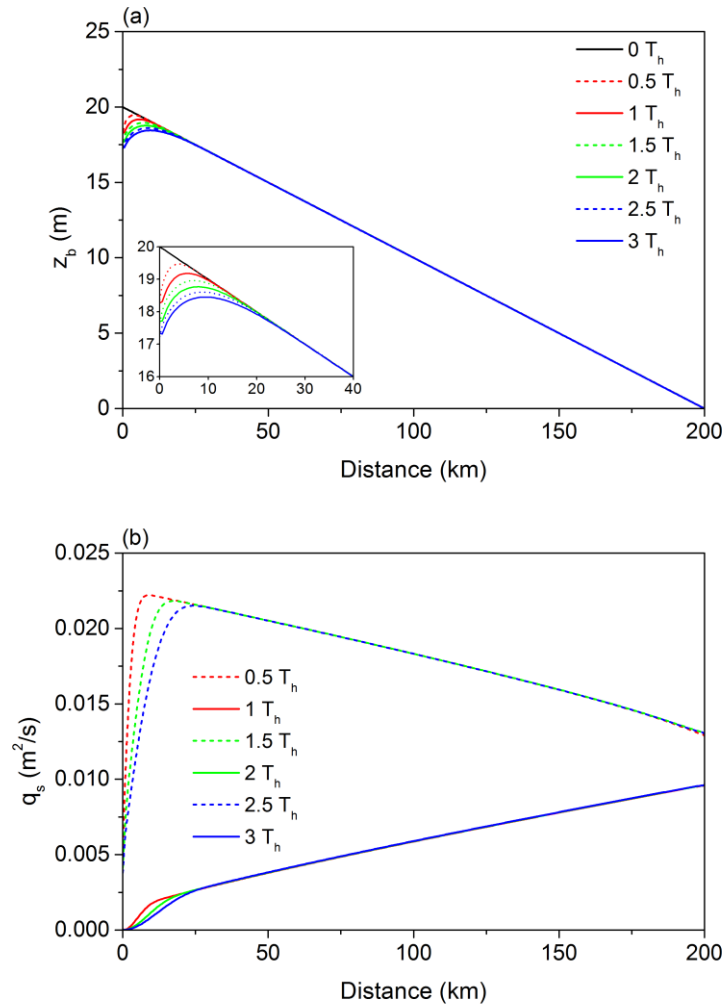

41

42 **Figure S3.** Results for uniform sediment within 3 hydrographs simulated by the flux form of Exner equation: time variation  
 43 of (a) bed elevation  $z_b$ , (b) sediment load per unit width  $q_s$  of the LYR in response to the cutoff of sediment supply. The inset  
 44 shows detailed results near the upstream end. The dash lines are at the peak discharge and the solid lines are at the minimum  
 45 discharge.

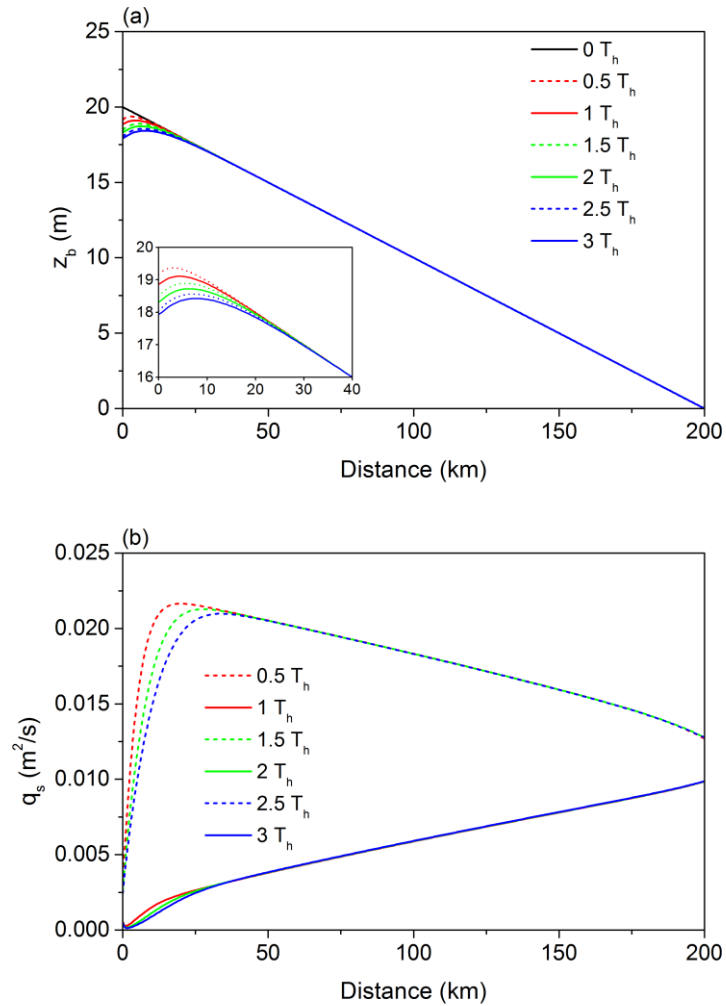

46

47 **Figure S4.** Results for uniform sediment within 3 hydrographs simulated by the entrainment form of Exner equation: time  
 48 variation of (a) bed elevation  $z_b$ , (b) sediment load per unit width  $q_s$  of the LYR in response to the cutoff of sediment supply.  
 49 The inset shows detailed results near the upstream end. The dash lines are at the peak discharge and the solid lines are at the  
 50 minimum discharge.

### 51 **S3: Numerical simulation of sediment mixtures under hydrographs**

52 In this section, we study additional examples for the case of sediment mixtures. The computational conditions are the  
 53 same as those implemented in Section 3.2 of the main text, except that the unsteady inflow discharge is considered. The flood

54 hydrograph is identical to that in Section S2, as shown in Fig. S2. The sediment supply rate is the same as that in Section 3.2  
 55 of the main text, thus corresponding to a cutoff of sediment supply. The hydrograph is repeated for 3 times.

56 Figure S5 shows the river evolution within the first 3 floods predicted by the flux form of Exner equation, and Fig.  
 57 S6 shows the river evolution predicted by the entrainment form of Exner equation. The sediment fall velocity is calculated by  
 58 the relation of Dietrich (1982). Even though the river morphodynamic processes become much more complicated when the  
 59 hydrograph rather than constant flow discharge is considered, a comparison of Figs. S5 and S6 still shows that the two  
 60 formulations predict very different patterns of grain sorting. Kinematic waves are evident in the flux form, but no kinematic  
 61 waves are evident in the entrainment form.

62

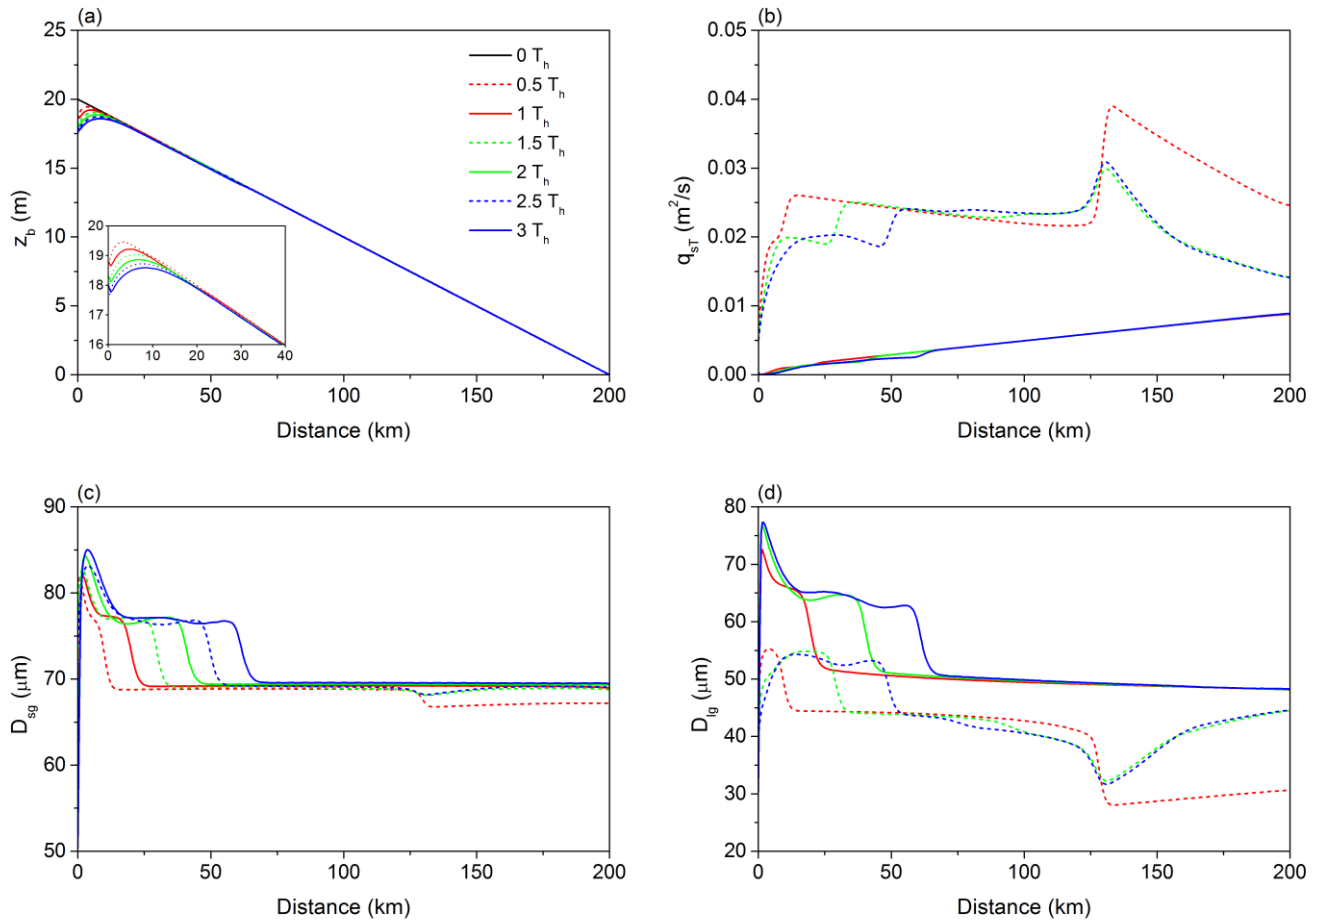

63

64 **Figure S5.** Results for sediment mixtures within 3 hydrographs simulated by the flux form of Exner equation: time variation  
 65 of (a) bed elevation  $z_b$ , (b) total sediment load  $q_{sT}$ , (c) surface geometric mean grain size  $D_{sg}$  and (d) geometric mean grain size

66 of sediment load of the LYR in response to the cutoff of sediment supply. The inset shows detailed results near the upstream  
 67 end. The dash lines are at the peak discharge and the solid lines are at the minimum discharge.

68

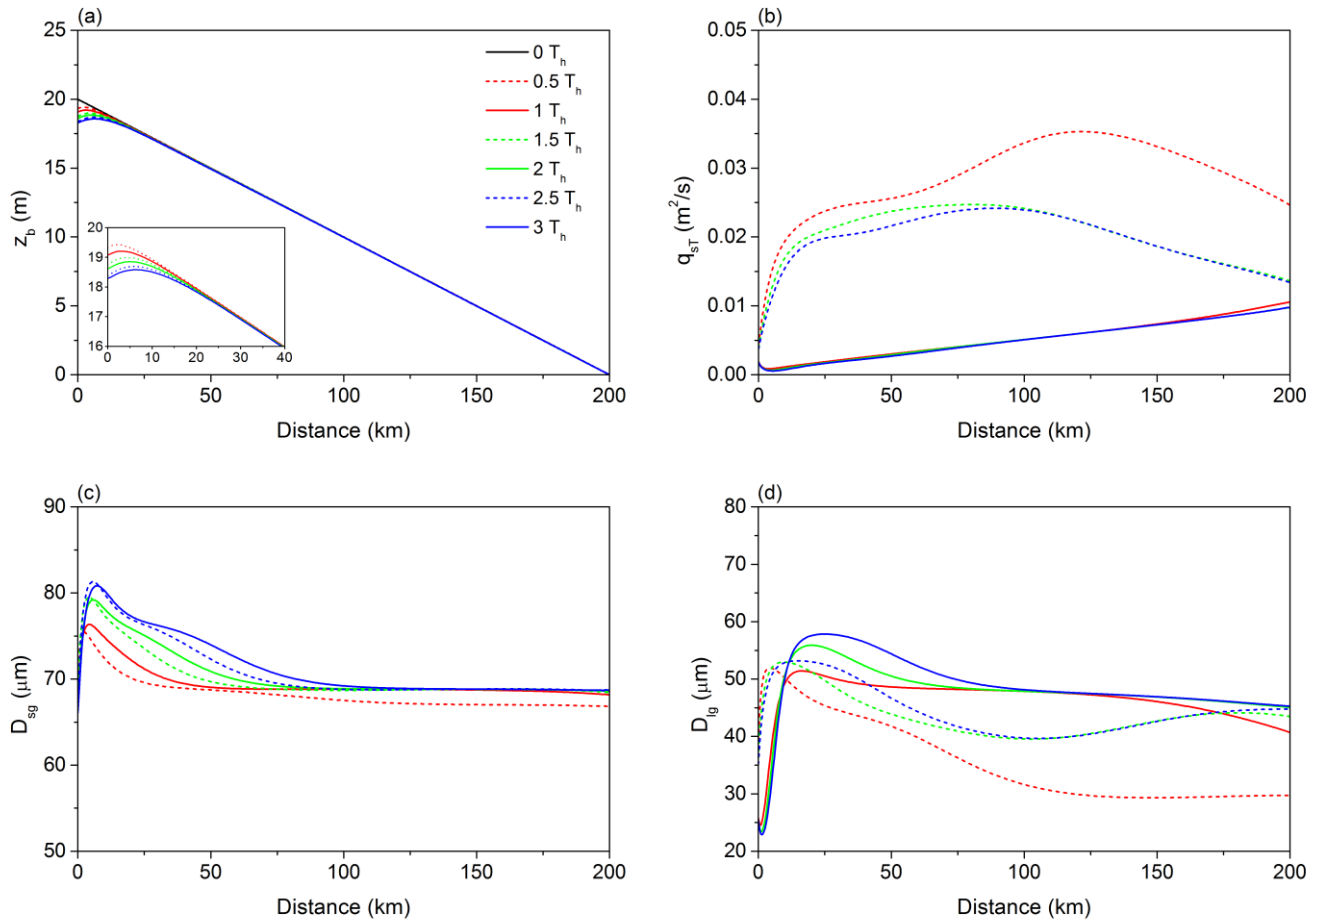

69

70 **Figure S6.** Results for sediment mixtures within 3 hydrographs simulated by the entrainment form of Exner equation: time  
 71 variation of (a) bed elevation  $z_b$ , (b) total sediment load  $q_{sT}$ , (c) surface geometric mean grain size  $D_{sg}$  and (d) geometric mean  
 72 grain size of sediment load of the LYR in response to the cutoff of sediment supply. The inset shows detailed results near the  
 73 upstream end. The dash lines are at the peak discharge and the solid lines are at the minimum discharge.

74 **S4: Iterative solution of sediment transport rate  $q_{si}$  in the entrainment form**

75 The parameter  $q_{si}$  in Eq. (40) of the main text is solved iteratively as given below,



$$76 \quad q_{si}^{(m+1)} = q_{sei} - \frac{q_w}{v_{si}r_{oi}} \left[ \frac{1}{I_f} \frac{\partial \left( \frac{q_{si}^{(m)}}{u} \right)}{\partial t} + \frac{\partial q_{si}^{(m)}}{\partial x} \right] \quad (S5)$$

77 where the superscript denotes the order of iteration. The following zero-order solution is specified as an initial value;

$$78 \quad q_{si}^{(0)} = q_{sei} \quad (S6)$$

79 From this we can get the first order and second order solutions,

$$80 \quad q_{si}^{(1)} = q_{sei} - \frac{q_w}{v_{si}r_{oi}} \left[ \frac{1}{I_f} \frac{\partial \left( \frac{q_{sei}}{u} \right)}{\partial t} + \frac{\partial q_{sei}}{\partial x} \right] \quad (S7)$$

$$81 \quad q_{si}^{(2)} = q_{sei} - \frac{q_w}{v_{si}r_{oi}} \frac{1}{I_f} \frac{\partial}{\partial t} \frac{1}{u} \left\{ q_{sei} - \frac{q_w}{v_{si}r_{oi}} \left[ \frac{1}{I_f} \frac{\partial \left( \frac{q_{sei}}{u} \right)}{\partial t} + \frac{\partial q_{sei}}{\partial x} \right] \right\} - \frac{q_w}{v_{si}r_{oi}} \frac{\partial}{\partial x} \left\{ q_{sei} - \frac{q_w}{v_{si}r_{oi}} \left[ \frac{1}{I_f} \frac{\partial \left( \frac{q_{sei}}{u} \right)}{\partial t} + \frac{\partial q_{sei}}{\partial x} \right] \right\} \quad (S8)$$

83 The second order iterative solution to Eq. (S8) is tedious in form, but the only terms of importance on the right-hand  
84 side are the spatial derivatives. Therefore we drop the time derivatives for simplicity. This gives,

$$85 \quad q_{si} = q_{sei} - \frac{q_w}{v_{si}r_{oi}} \frac{\partial}{\partial x} \left( q_{sei} - \frac{q_w}{v_{si}r_{oi}} \frac{\partial q_{sei}}{\partial x} \right) \quad (S9)$$

86 which corresponds to Eq. (41) as implemented in Section 4.2 of the main text.
